# Supplementary material for: Characterization and evolutionary origin of novel C2H2 zinc finger protein (ZNF648) required for both erythroid and megakaryocyte differentiation in humans
Source: PubMed Central journal article supplement — Haematologica. 2020 Oct 5;106(11):2859–73. doi: 10.3324/haematol.2020.256347 (PMC8561289; doi:10.3324/haematol.2020.256347), 2020-10-05
Supplement: 2020_256347_FERGUSON_SUPPL.pdf [file 2020_256347_FERGUSON_SUPPL.pdf]

## Characterization and evolutionary origin of novel C2H2 zinc finger protein (ZNF648) required for both erythroid and megakaryocyte differentiation in humans

Daniel C. J. Ferguson,<sup>1\*</sup> Juraidah Haji Mokim,<sup>1\*</sup> Marjolein Meinders,<sup>1</sup> Edmund R. R. Moody,<sup>2</sup> Tom A. Williams,<sup>2</sup> Sarah Cooke,<sup>1</sup> Kongtana Trakarnsanga,<sup>3</sup> Deborah E. Daniels,<sup>1,4</sup> Ivan Ferrer-Vicens,<sup>1</sup> Deborah Shoemark,<sup>1</sup> Chartsiam Tipgomut,<sup>3</sup> Katherine A. Macinnes,<sup>1,4</sup> Marieangela C. Wilson,<sup>1</sup> Belinda K. Singleton<sup>4,5</sup> and Jan Frayne<sup>1,4</sup>

<sup>1</sup>School of Biochemistry, University of Bristol, Bristol, UK; <sup>2</sup>School of Biological Sciences, University of Bristol, Bristol, UK; <sup>3</sup>Department of Biochemistry, Faculty of Medicine Siriraj Hospital, Mahidol University, Bangkok, Thailand; <sup>4</sup>NIHR Blood and Transplant Research Unit in Red Blood Cell Products, University of Bristol, Bristol, UK and <sup>5</sup>Bristol Institute for Transfusion Sciences, National Health Service Blood and Transplant (NHSBT), Bristol, UK

*\*DCJF and JHM contributed equally as co-first authors.*

©2021 Ferrata Storti Foundation. This is an open-access paper. doi:10.3324/haematol.2020.256347

Received: April 22, 2020.

Accepted: September 15, 2020.

Pre-published: October 5, 2020.

Correspondence: JAN FRAYNE - Jan.Frayne@Bristol.ac.uk

---

**A**

| Linker sequence      | Position                                                     |
|----------------------|--------------------------------------------------------------|
| TGERP                | Between zinc fingers 1 and 2<br>Between zinc fingers 7 and 8 |
| TGEKP<br>(consensus) | Between zinc fingers 2 and 3                                 |
| SGERP                | Between zinc fingers 5 and 6                                 |
| TGQRP                | Between zinc fingers 6 and 7                                 |

**B**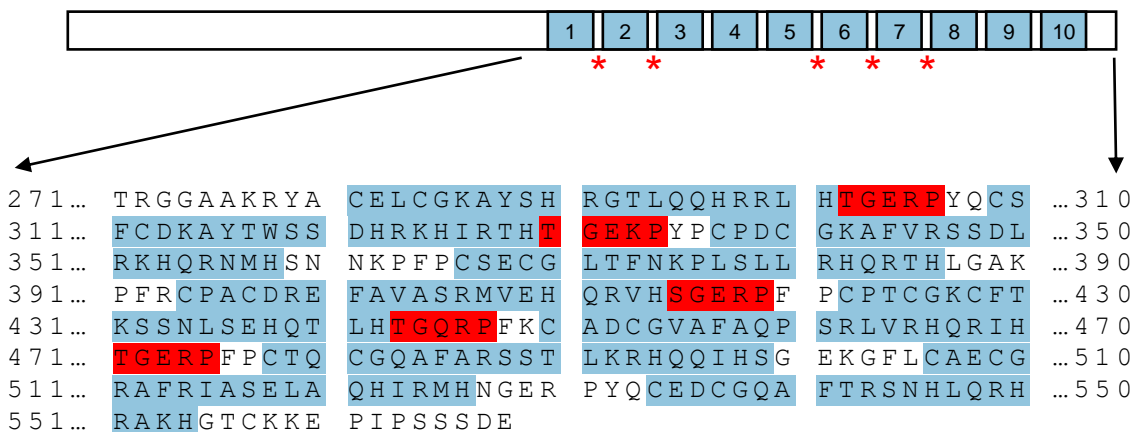

**Supplementary Figure 1. Linker sequences between Zinc fingers of human ZNF648.** A) Linker sequences detected between indicated zinc fingers. B) Sequence of zinc finger domain with linker sequences highlighted in red

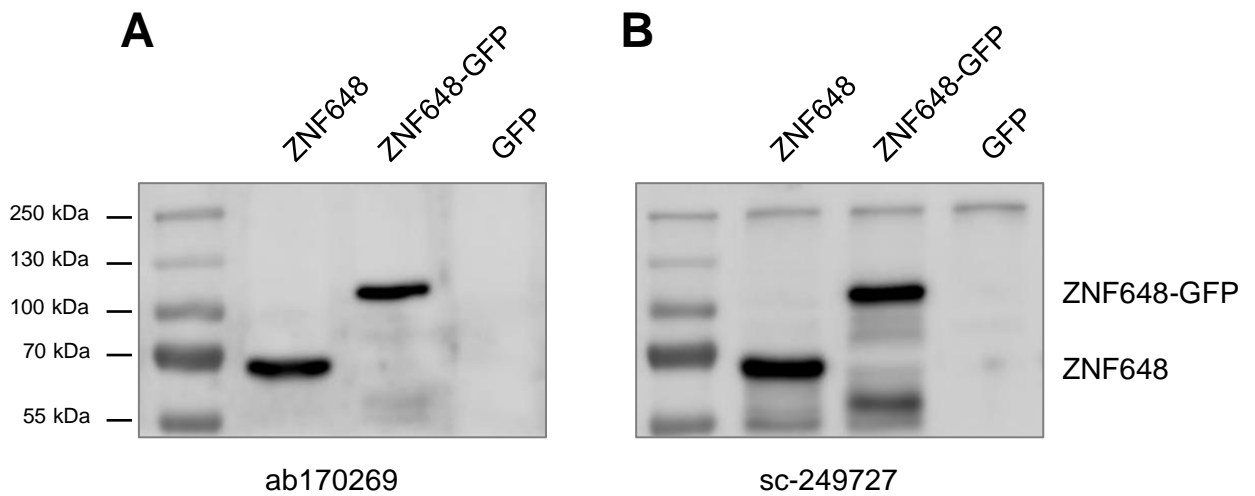

**Supplementary Figure 2. Validation of ZNF648 antibodies**

Cells were transduced with pXLG3-ZNF648 or pXLG3-ZNF648-GFP, containing the coding region of ZNF648, or a control construct (GFP only). Western blot was probed with ZNF648 antibody A) ab170269 (Abcam) or B) sc-249727 (Santa Cruz)

**A**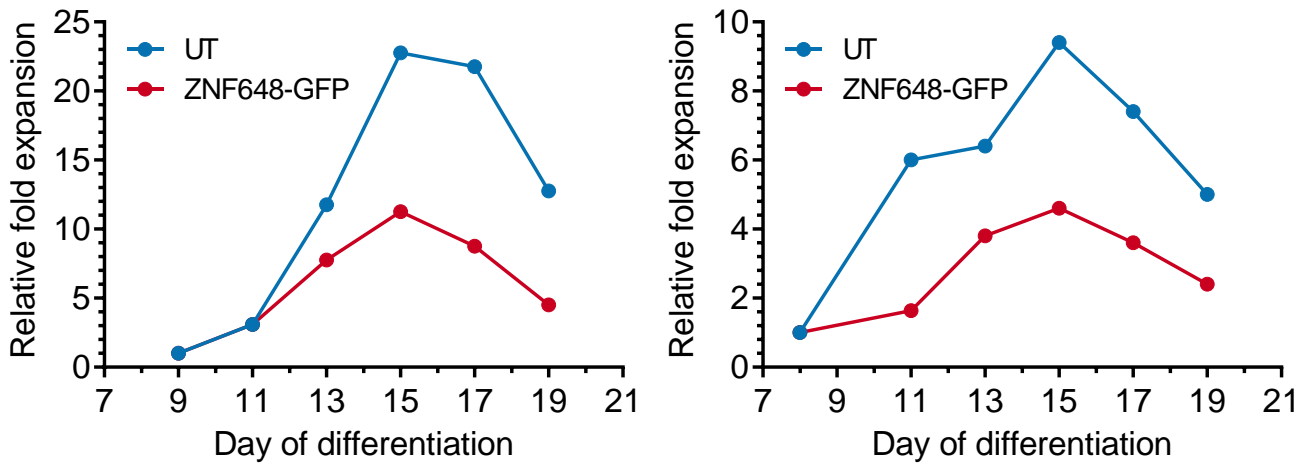**B**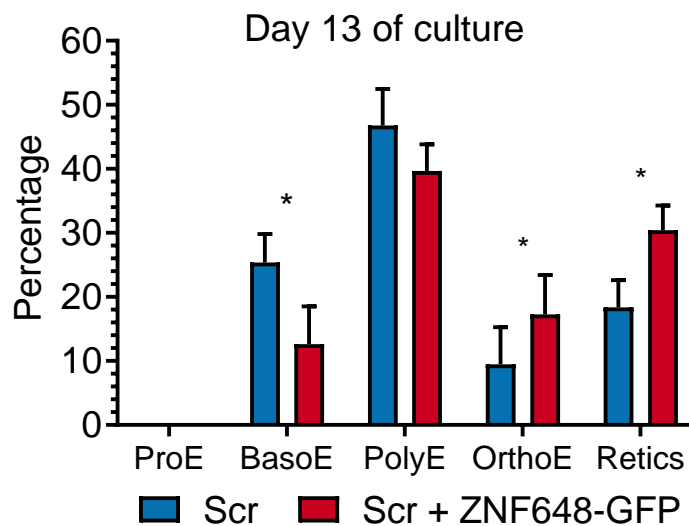

**Supplementary Figure 3. Exogenous expression of ZNF648 in adult erythroid cells impedes proliferation and advances differentiation.** Erythroid cells were differentiated from a pool of CD34<sup>+</sup> cells isolated from peripheral blood of four adult donors and transduced with ZNF648-GFP on day 3 in culture, with GFP-positive cells isolated on day 8 by FACS. A) Relative fold expansion of ZNF648 over-expressing adult erythroid cells compared to control cells. Graphs are repeats for two separate pools of peripheral blood CD34<sup>+</sup> cells B) proportion of adult erythroid cells at each stage of differentiation present at day 13 of culture. ProE = proerythroblast, BasoE = basophilic erythroblast, PolyE = polychromatic erythroblast, OrthoE = orthochromatic erythroblast, Retics = reticulocytes. \*P < 0.05, n = 2 ± SD one-tailed t-test.

Scr shRNA control

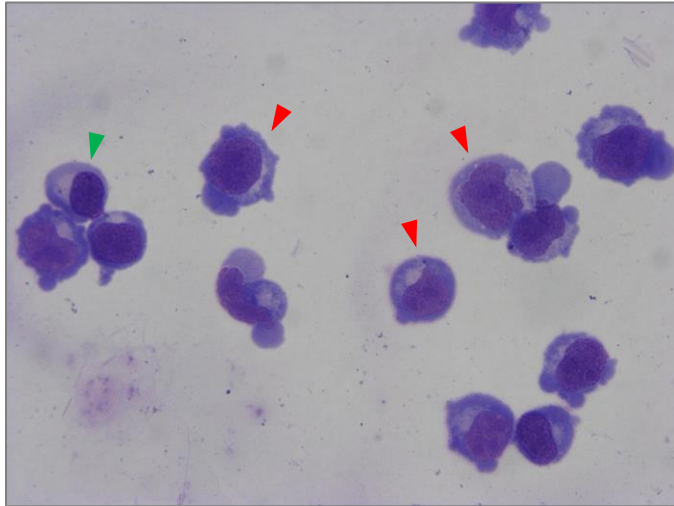

ZNF648 shRNA

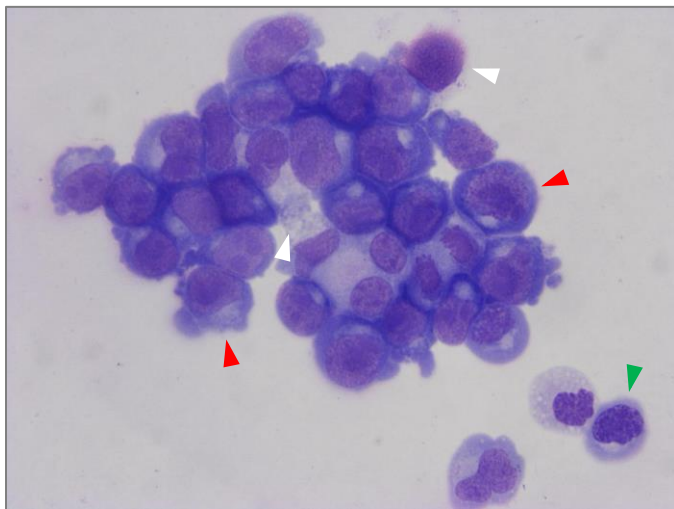

**Supplementary Figure 4. Morphology of erythroid cells differentiated from adult PB CD34<sup>+</sup> cells transduced with scrambled (Scr) or ZNF648 shRNA at day 8 in culture. Cell stained with May-Grünwald-Giemsa. Red arrow = pro-erythroblast, green arrow = basophilic erythroblast, white arrow = cell debris.**

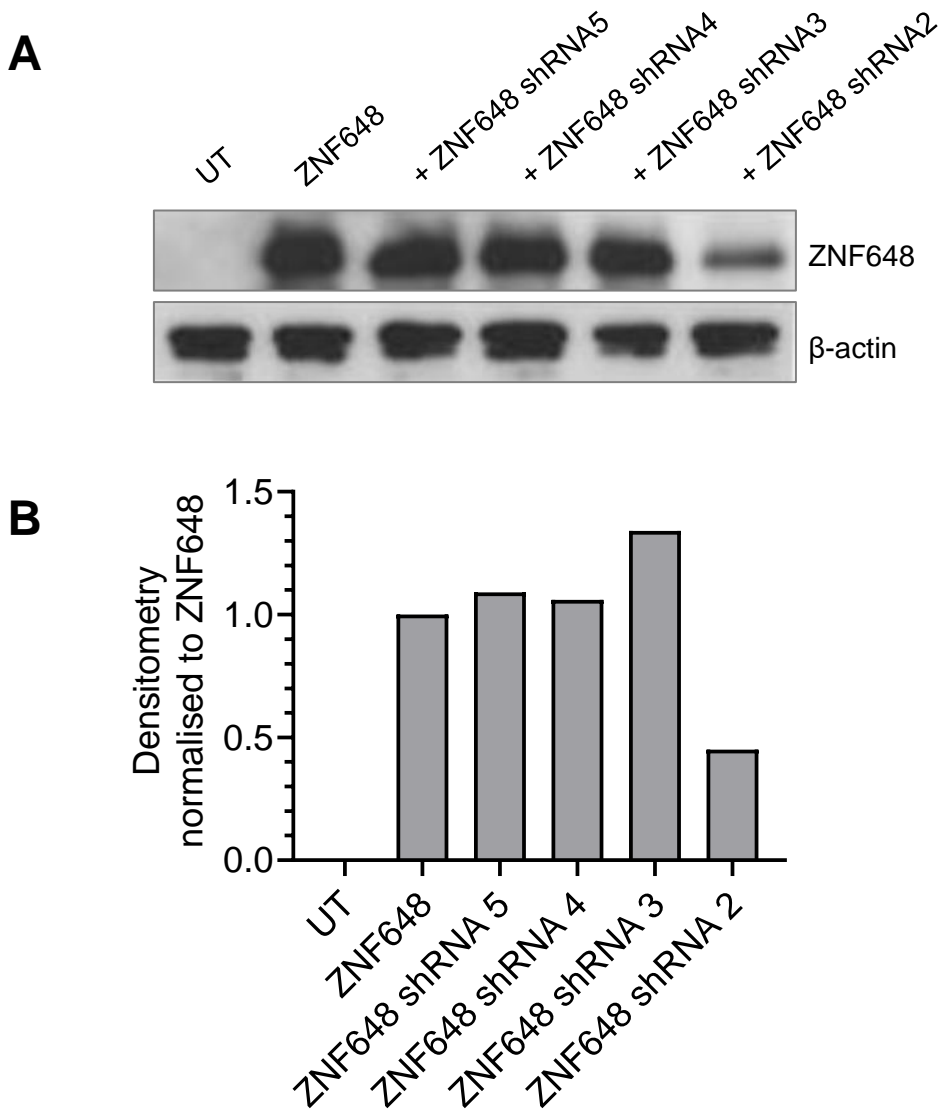

**Supplementary Figure 5. Evaluating additional ZNF648 shRNAs.** The erythroid cell line K562 was first transduced with pXLG3-ZNF648, containing the coding region of ZNF648, and allowed to recover for 3 days. Cells were then transduced with a control scrambled shRNA (Scr) or with one of four ZNF648 shRNAs. A) Western blot of whole cell lysates probed with ZNF648 antibody. B) Densitometry values from western blot

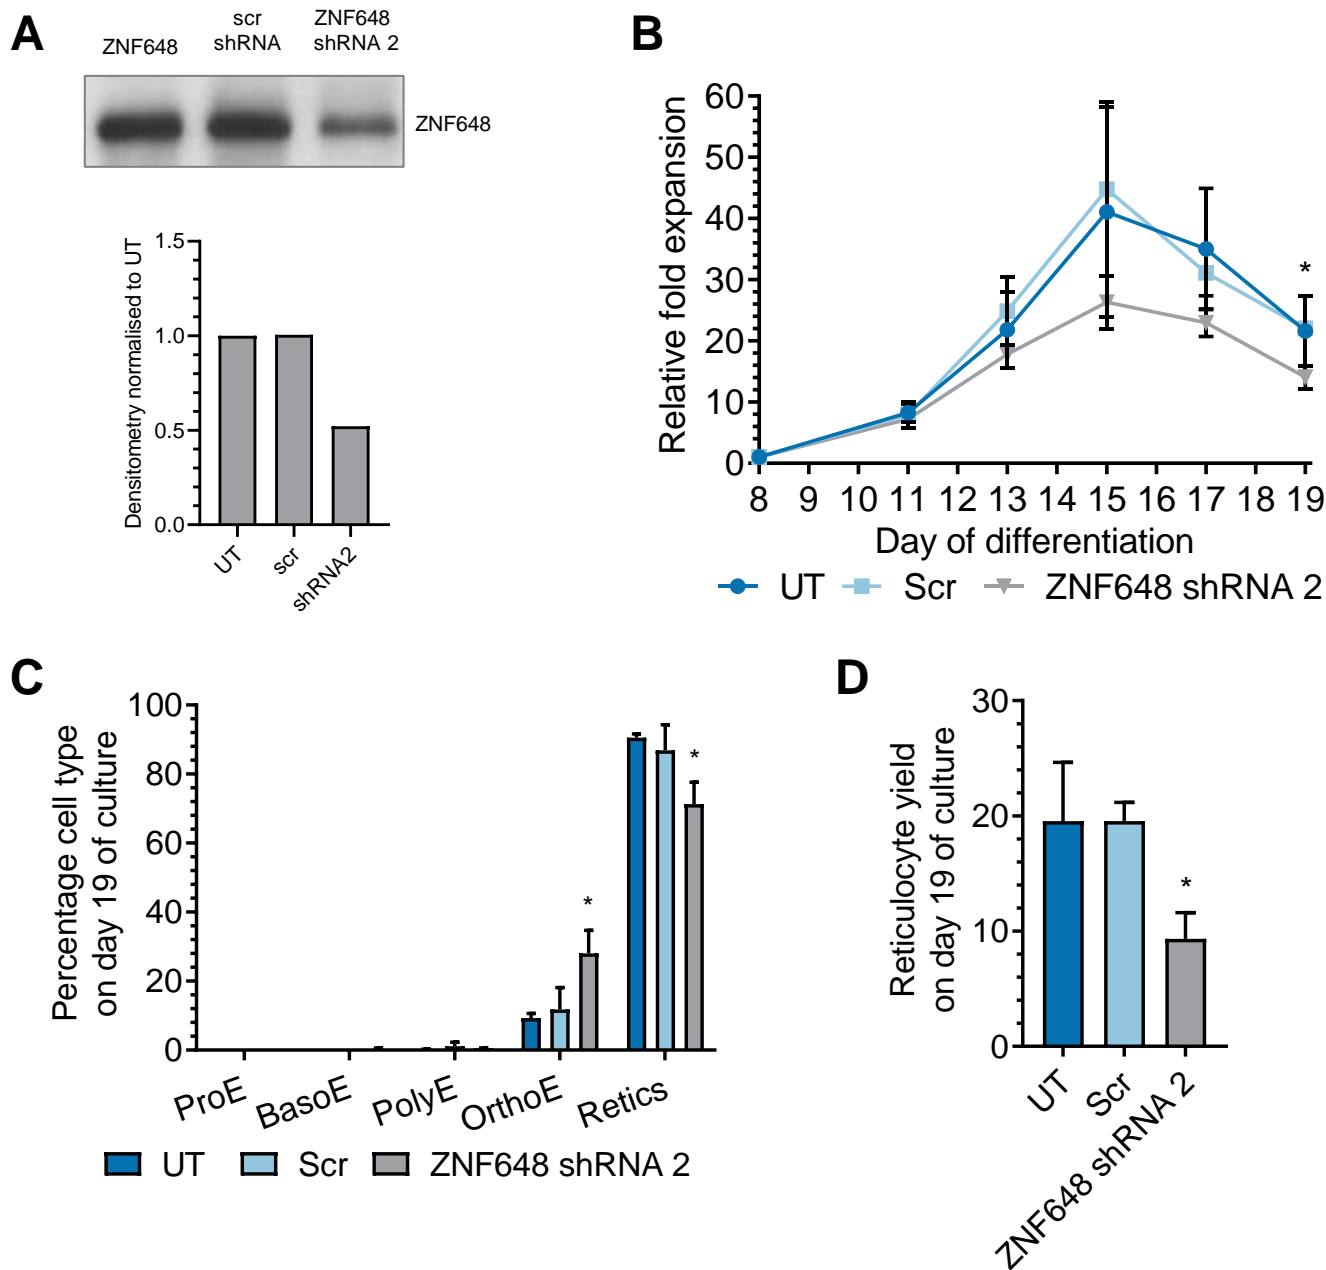

**Supplementary Figure 6. Knockdown of ZNF648 in adult erythroid cells with ZNF648 shRNA2.** A) effect of ZNF648 shRNA2 on levels of ectopic ZNF648 in transduced K562 cells. Western blot probed with ZNF648 antibody and associated densitometry values. Adult PB CD34<sup>+</sup> cells at day 3 in culture were transduced with scrambled shRNA (Scr) or ZNF648 shRNA2, puromycin selected and seeded at same cell density along with untransduced cells (UT). B) Relative fold expansion during differentiation compared to cell number at day 8 in culture. C) Proportion of cells at different stages of differentiation at day 19 in culture, ProE = proerythroblast, BasoE= basophilic erythroblast, PolyE = polychromatic erythroblast, OrthoE = orthochromatic erythroblast, Retics = reticulocytes. D) Reticulocyte yield at day 19 of culture. \*p<0.05, t-test, n=3 ± SD.

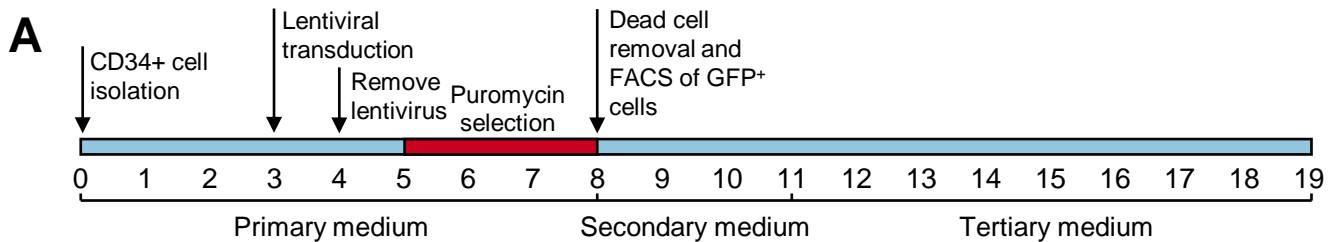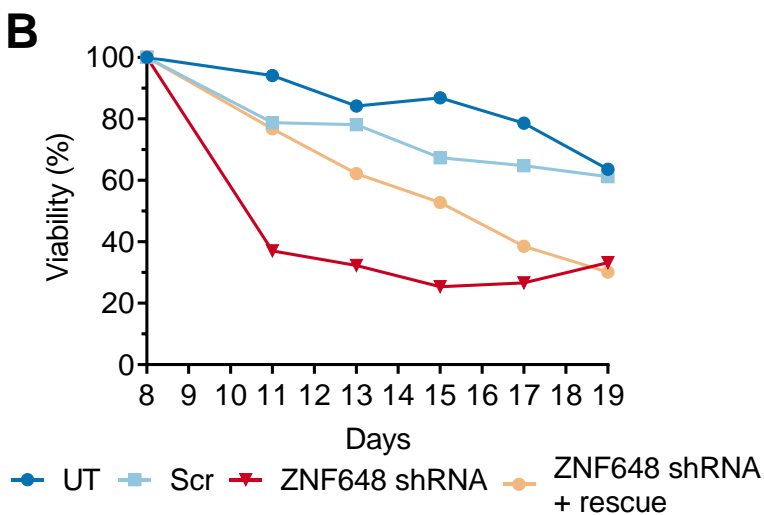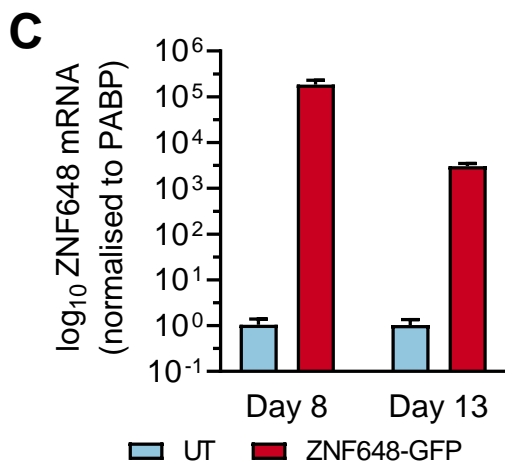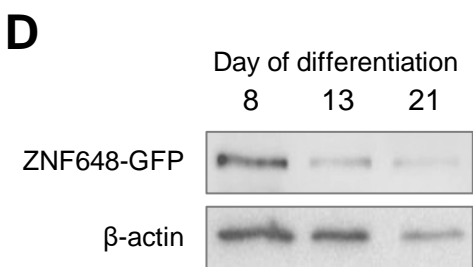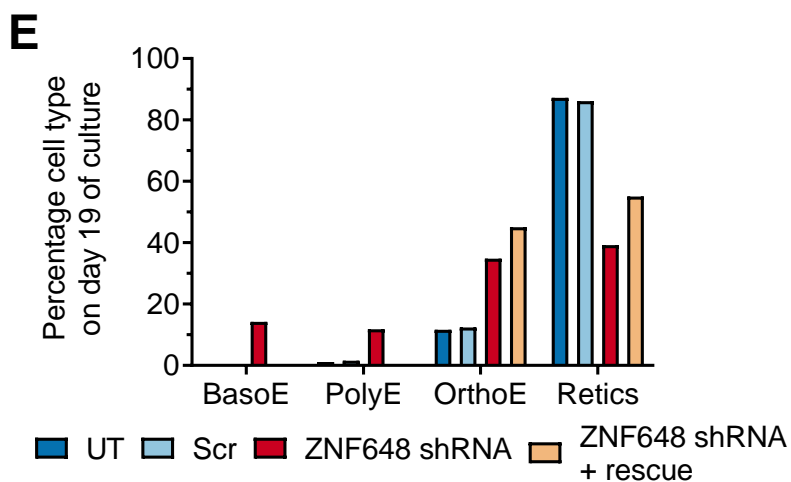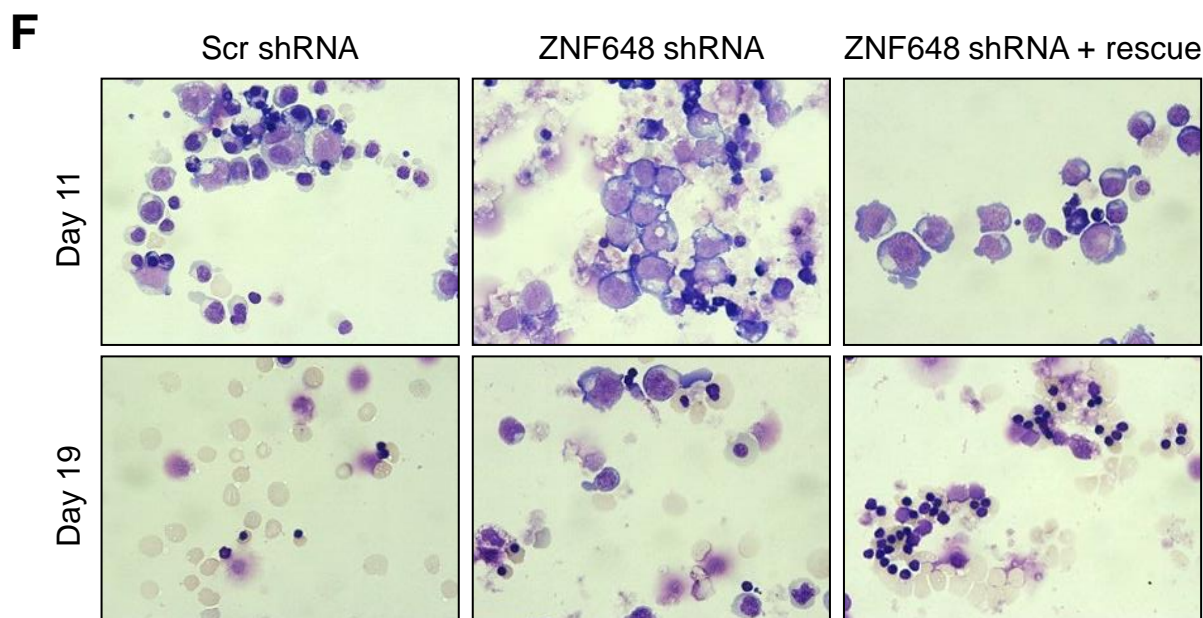



**Supplementary Figure 7. Rescue of ZNF648 in erythroid cells following knockdown recovers phenotype.** Erythroblasts differentiated from adult PB CD34<sup>+</sup> cells at day 3 in culture were transduced with scrambled shRNA (Scr) as a control, ZNF648 shRNA, or co-transduced with ZNF648 shRNA and ZNF648-GFP (rescue). Untransduced cells (UT) served as a further control. A) Schematic of experimental design. B) Viability of cells during differentiation assessed by trypan blue exclusion. C) qPCR of ZNF648-GFP transcript levels normalised to UT controls at day 8 and day 13 of differentiation. D) Western blot of whole cell lysates from cells at day 8, 13 and 21 of differentiation probed with ZNF648 antibody along with antibody to actin as a protein loading control. E) Proportion of cells at different stages of differentiation at day 19 of differentiation, Baso = basophilic erythroblast, PolyE = polychromatic erythroblast, OrthoE = orthochromatic erythroblast, Retics = reticulocytes. F) Morphology of cells at day 11 and 19 in culture stained with May-Grünwald-Giemsa. Magnification x500.

**A**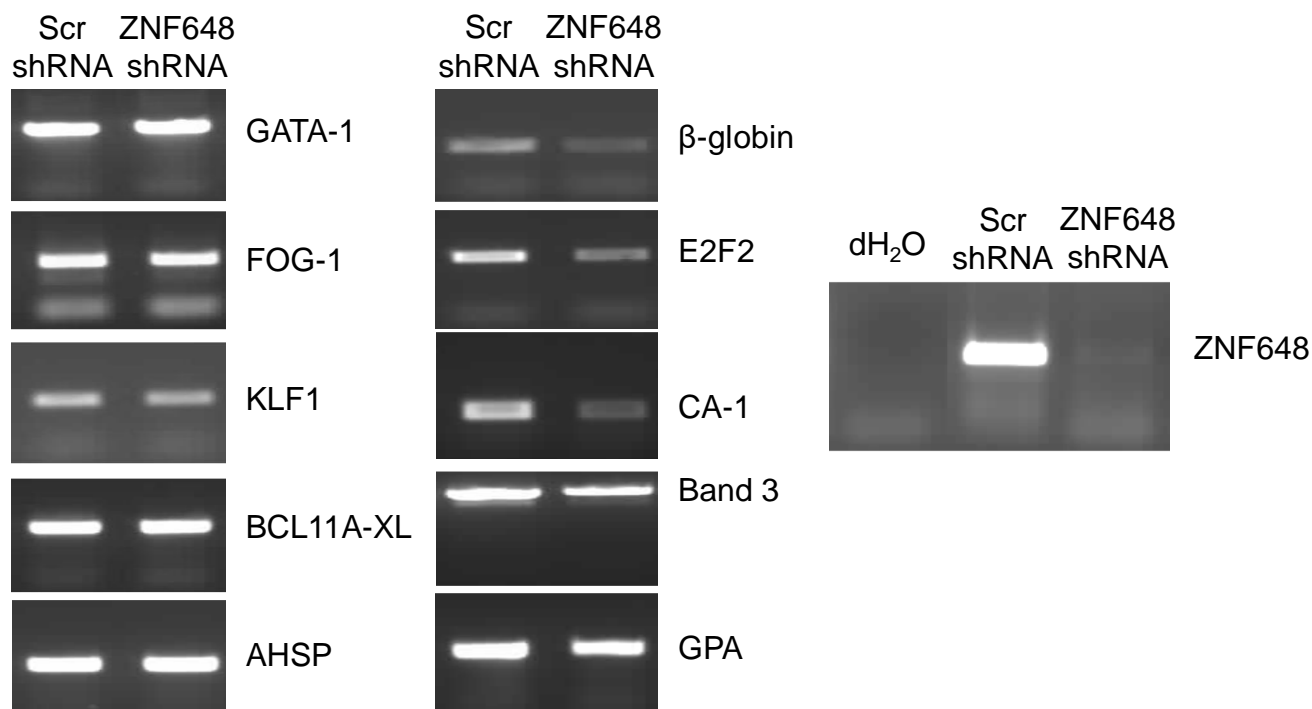**B**

| GENE           | Forward primer                 | Reverse primer               |
|----------------|--------------------------------|------------------------------|
| GATA1          | 5'-TTCAGCAGCCTATTCTCTCC-3'     | 5'-CCTTGGTAGAGATGGGCAGTA-3'  |
| FOG-1          | 5'-AAGGACAGGAACCAGAACC-3'      | 5'-CTCTGCTGGCTCCTTCTTCACA-3' |
| KLF1           | 5'-GCAAGAGCTACACCAAGAGC-3'     | 5'-GCTGTCTATGGGTCCGTGTT-3'   |
| BCL11A-XL      | 5'-AGATCCCTTCCTTAGCTTCG-3'     | 5'-TCAAACTCGATCACTGTGC-3'    |
| AHSP           | 5'-GTTAGACCTGAAGGCAGATGGC-3'   | 5'-CTAAGGACATGAAGGTCAGAG-3'  |
| HBB            | 5'-CTTTAGTGATGGCCTGGCTC-3'     | 5'-GGCAGAATCCAGATGCTCAA-3'   |
| E2F2           | 5'-CTCGGTATGACACTTCGCTGG-3'    | 5'-GCACTTCCAGTCTCGTCTGCG-3'  |
| CA1            | 5'-TCCTACAACCCAGCCACAG-3'      | 5'-CTTTGAGGCAGCTTCAGC-3'     |
| SLC4A1 (Band3) | 5'-CAGAACTCTCGGTGCCTG-3'       | 5'-CCACTTCGTCGTATTCATCCC-3'  |
| GPA            | 5'-GTGAGCATATCAGCATCAAGTACC-3' | 5'-TAAAGGCACGTCTGTGTCAGG-3'  |
| ZNF648         | 5'-GTATGGAAGCCTACGTGCTC-3'     | 5'-AGAGGTCACACCCTAGTTCC-3'   |

**Supplementary Figure 8. Effect of ZNF648 knockdown on gene expression by adult erythroid cells.** A) Expression of indicated genes measured by RT-PCR using RNA isolated from erythroid cells differentiated from adult peripheral blood CD34<sup>+</sup> cells transduced with scrambled (Scr) shRNA as control or ZNF648 shRNA, at day 8 in culture. B) Primer sequences for RT-PCR.

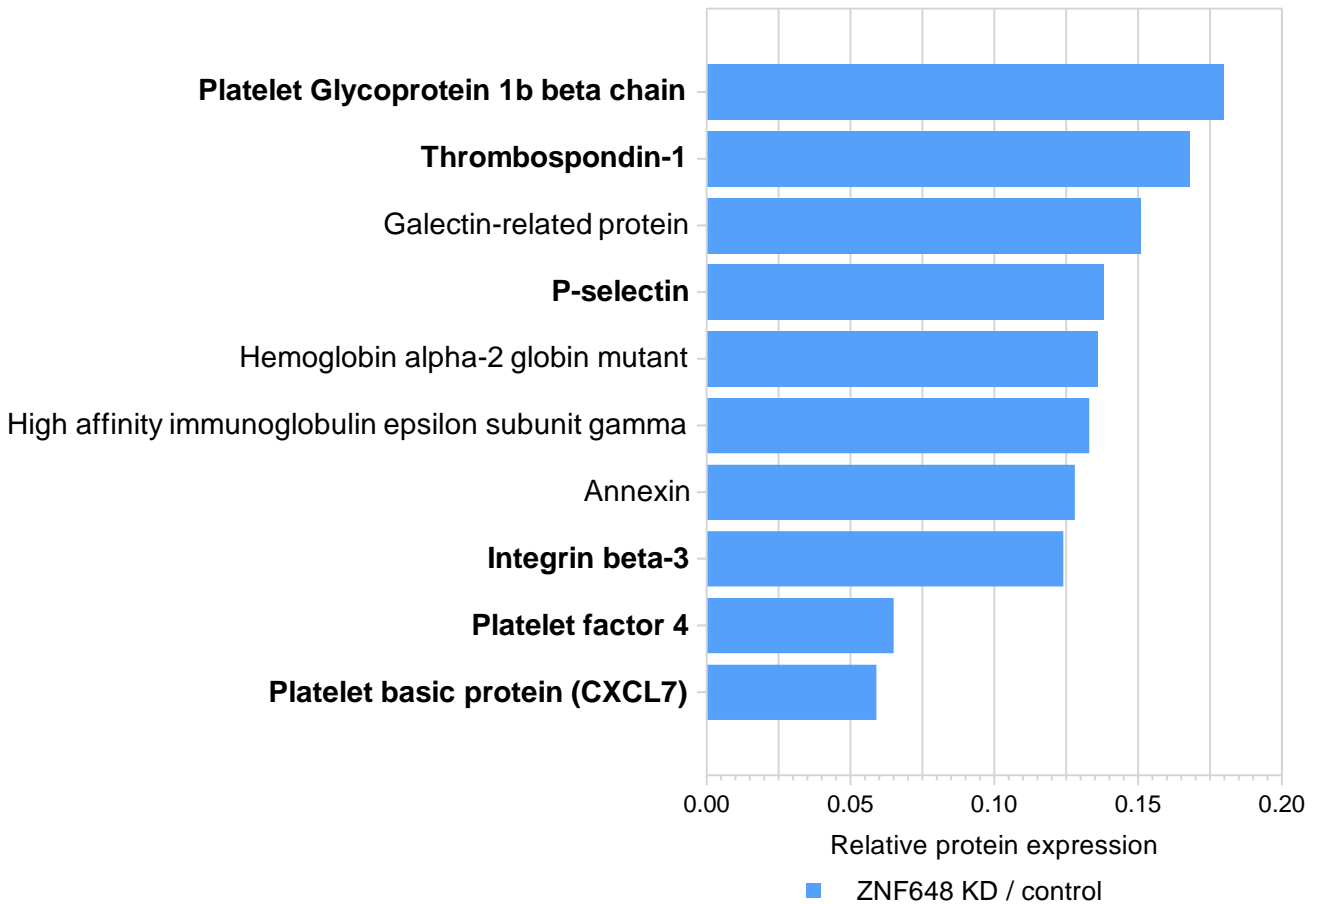

**Supplementary Figure 9. Six of the ten proteins most decreased in level following ZNF648 knock down are megakaryocyte associated.** Tandem Mass Tag labelling and nano-LC MS/MS was performed on whole cell lysates of erythroid cells transduced with ZNF648 or src (control) shRNA at day 8 in culture. The relative fold decrease in abundance of the 10 proteins displaying greatest magnitude decrease following ZNF648 knockdown are shown. Megakaryocyte-associated proteins are shown in bold text.

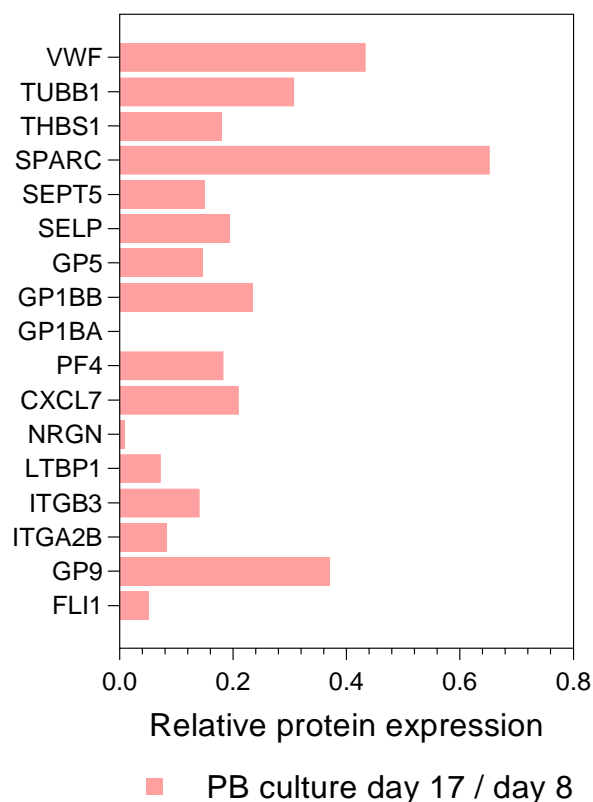

**Supplementary Figure 10. Megakaryocyte associated proteins decrease in level during erythroid differentiation.** Tandem Mass Tag labelling and nano-LC MS/MS was performed on whole cell lysates of erythroid cells at day 8 and 17 in culture. The relative decrease in level of megakaryocyte associated proteins at day 17 (majority of cells orthochromatic normoblasts and reticulocytes) compared to day 8 (majority of cells pro-erythroblasts) are shown.

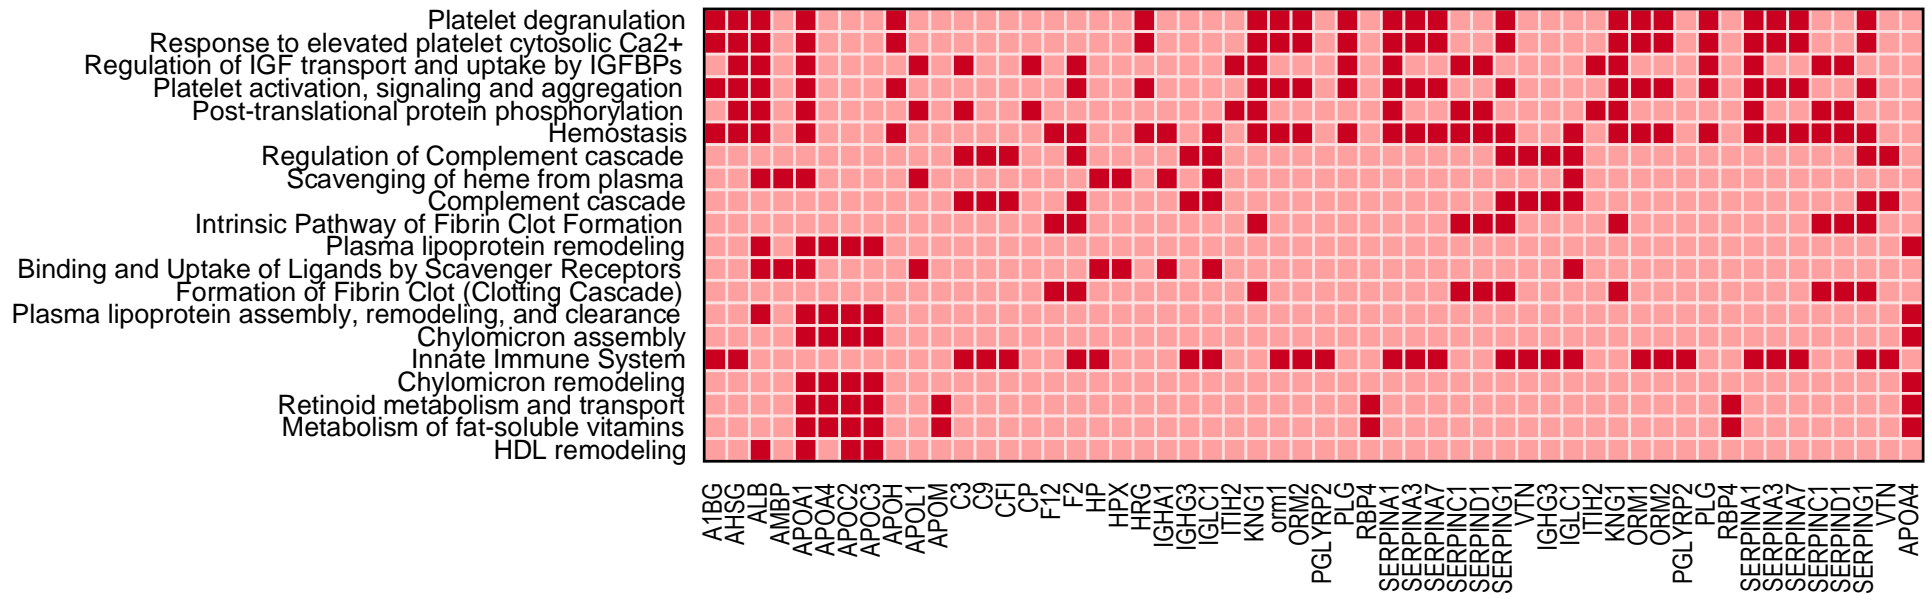

**Supplementary Figure 11. Pathway classification of those proteins increased in level following ZNF648 KD also increased in erythroid cells differentiated from three iPSC lines.** Proteins increased in level by four-fold or more following ZNF648 knockdown in adult erythroid cells, and also increased in level in erythroid cells differentiated from all three iPSC lines (compared to normal adult erythroid cells; Trakarnsanga *et al* 2014<sup>12</sup>) at day 8 in culture were entered into Reactome. Dark red indicates protein apportioned to pathway shown on left. Top 20 pathways shown with minimum probability of over representation in the dataset, corrected for false discovery rate, of  $p < 2.39 \times 10^{-5}$

# Supplementary Figure 12

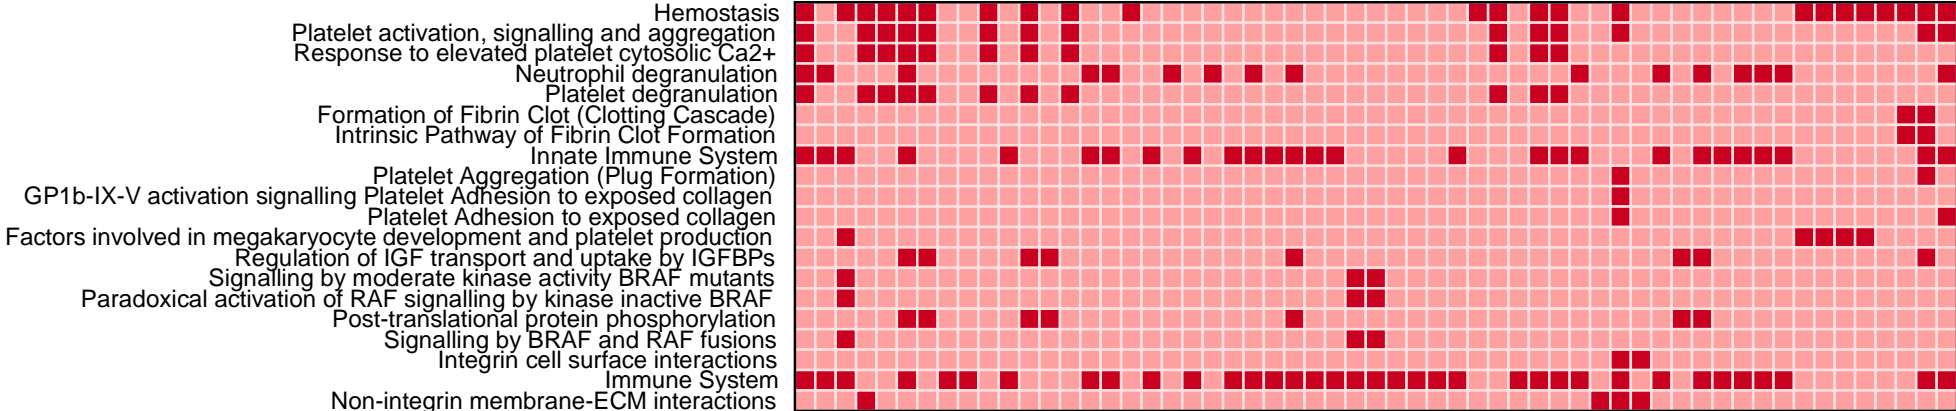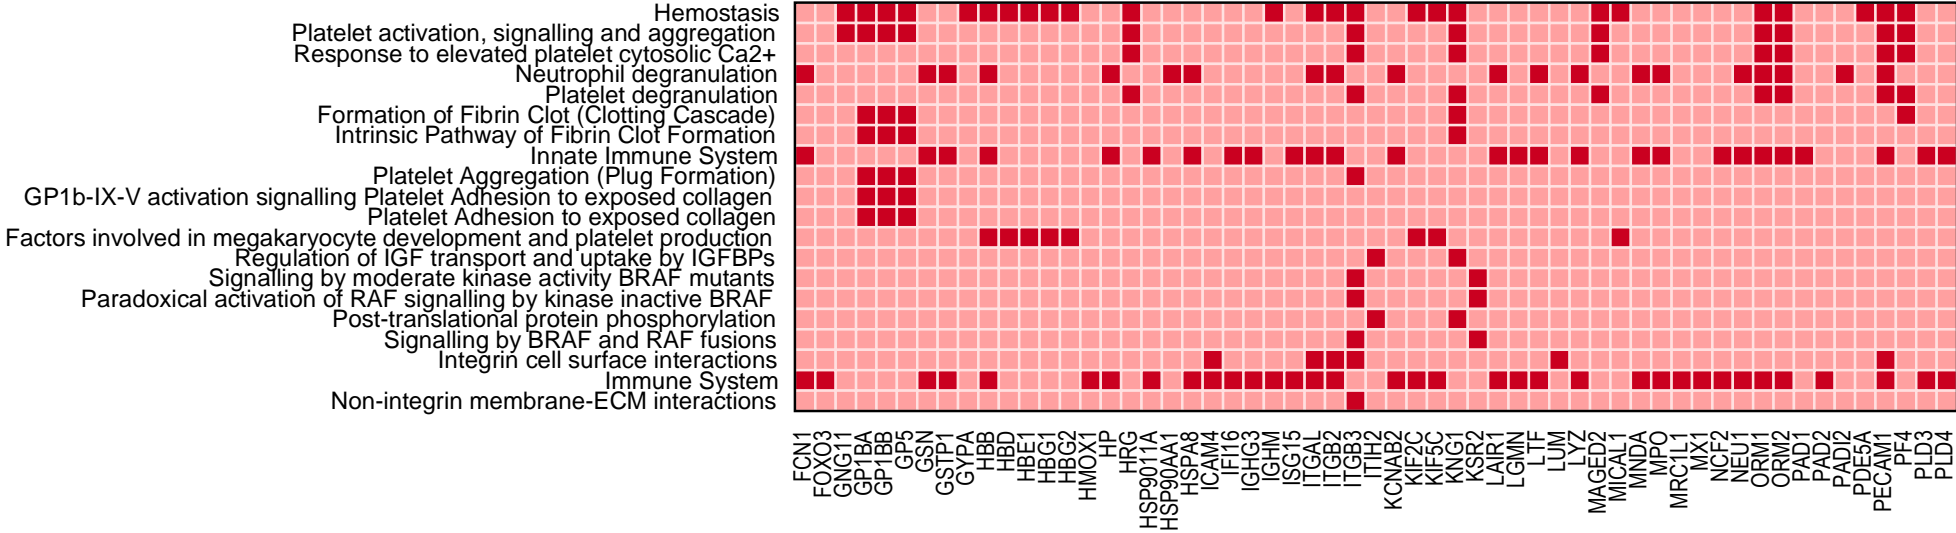

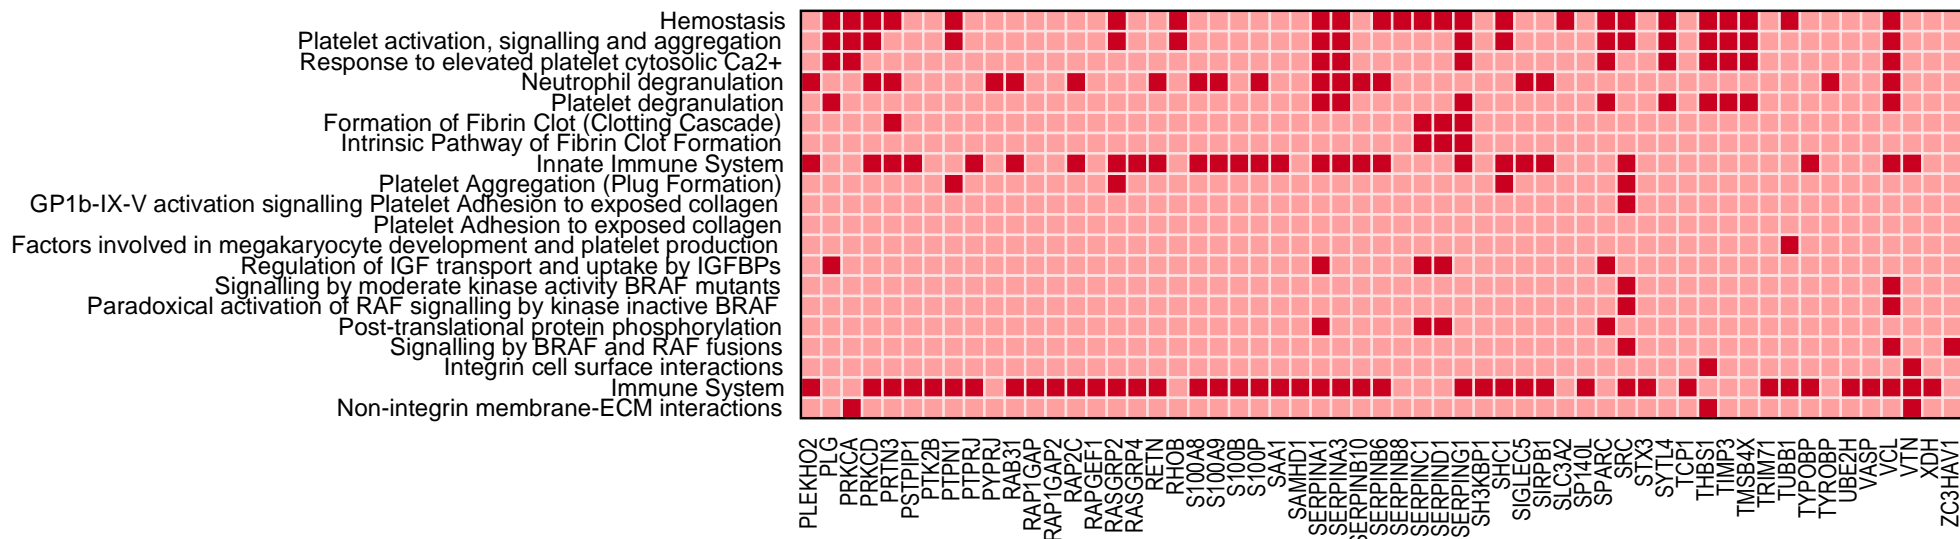

**Supplementary Figure 12. Pathway classification of proteins increased in erythroid cells differentiated from three iPSC lines compared to normal adult erythroid cells.** Common proteins increased in level by two-fold or more in proteomic dataset (Trakarnsanga *et al* 2014<sup>12</sup>) from three iPSC lines compared to normal adult erythroid cells at day 8 in culture were entered into Reactome. Dark red indicates protein apportioned to pathway shown on left. Top 20 pathways shown with minimum probability of over representation in the dataset, corrected for false discovery rate, of  $p < 1 \times 10^{-5}$

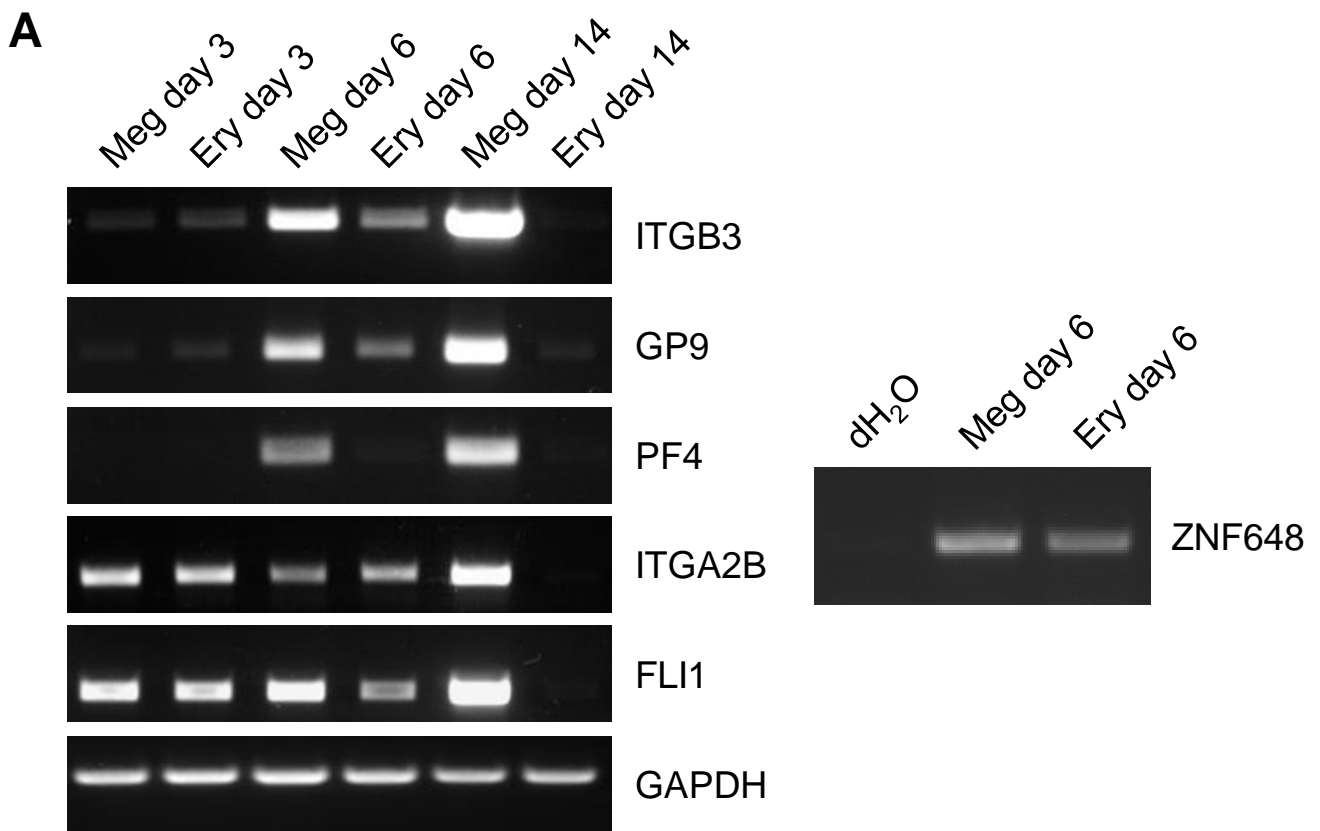

**B**

| GENE   | Forward primer               | Reverse primer              |
|--------|------------------------------|-----------------------------|
| ZNF648 | 5'-GTATGGAAGCCTACGTGCTC-3'   | 5'-AGAGGTCACACCCTAGTTCC-3'  |
| ITGB3  | 5'-GAGTTCCCAGTGAGTGAGGC-3'   | 5'-CTCATTGAAGCGGGTCACCT-3'  |
| GP9    | 5'-ACACTCCACCTTCCCTAGTCA-3'  | 5'-GCGTCACATCGAGGGTCTG-3'   |
| PF4    | 5'-CCAACTGATAGCCACGCTGA-3'   | 5'-CCAAGCATAACCAGTATTCAC-3' |
| ITGA2B | 5'-TTACTTGGGGTTCCAGTTTGA-3'  | 5'-GCTACCTACGGGCGTCTTC-3'   |
| FLI1   | 5'-CCTCAACAAAAGTCCTCCCCTT-3' | 5'-GGGAGGGACAAAGTTCACCT-3'  |
| GAPDH  | 5'-ACCACAGTCCATGCCATCAC-3'   | 5'-TCCACCACCCTGTTGCTGTA-3'  |

**Supplementary Figure 13. Comparison of ZNF648 expression and expression of key megakaryocyte proteins in erythroblasts and megakaryoblasts.** A) Expression of ZNF648, ITGB3, GP9, PF4, ITGA2B and FLI1 was analysed by RT-PCR in erythroblasts (Ery) and megakaryoblasts (Meg) differentiated from adult peripheral blood CD34<sup>+</sup> cells at day in culture indicated. RT-PCR of GAPDH was used as a control for cDNA concentration. Note on day six 32% of the population are megakaryoblasts (CD61<sup>+</sup>/CD41<sup>+</sup>) and 14% of the population on day fourteen are mature megakaryocytes (CD61<sup>+</sup>/CD42b<sup>+</sup>). In contrast all cells in the erythroid cultures are erythroid. B) Primer sequences for RT-PCR.



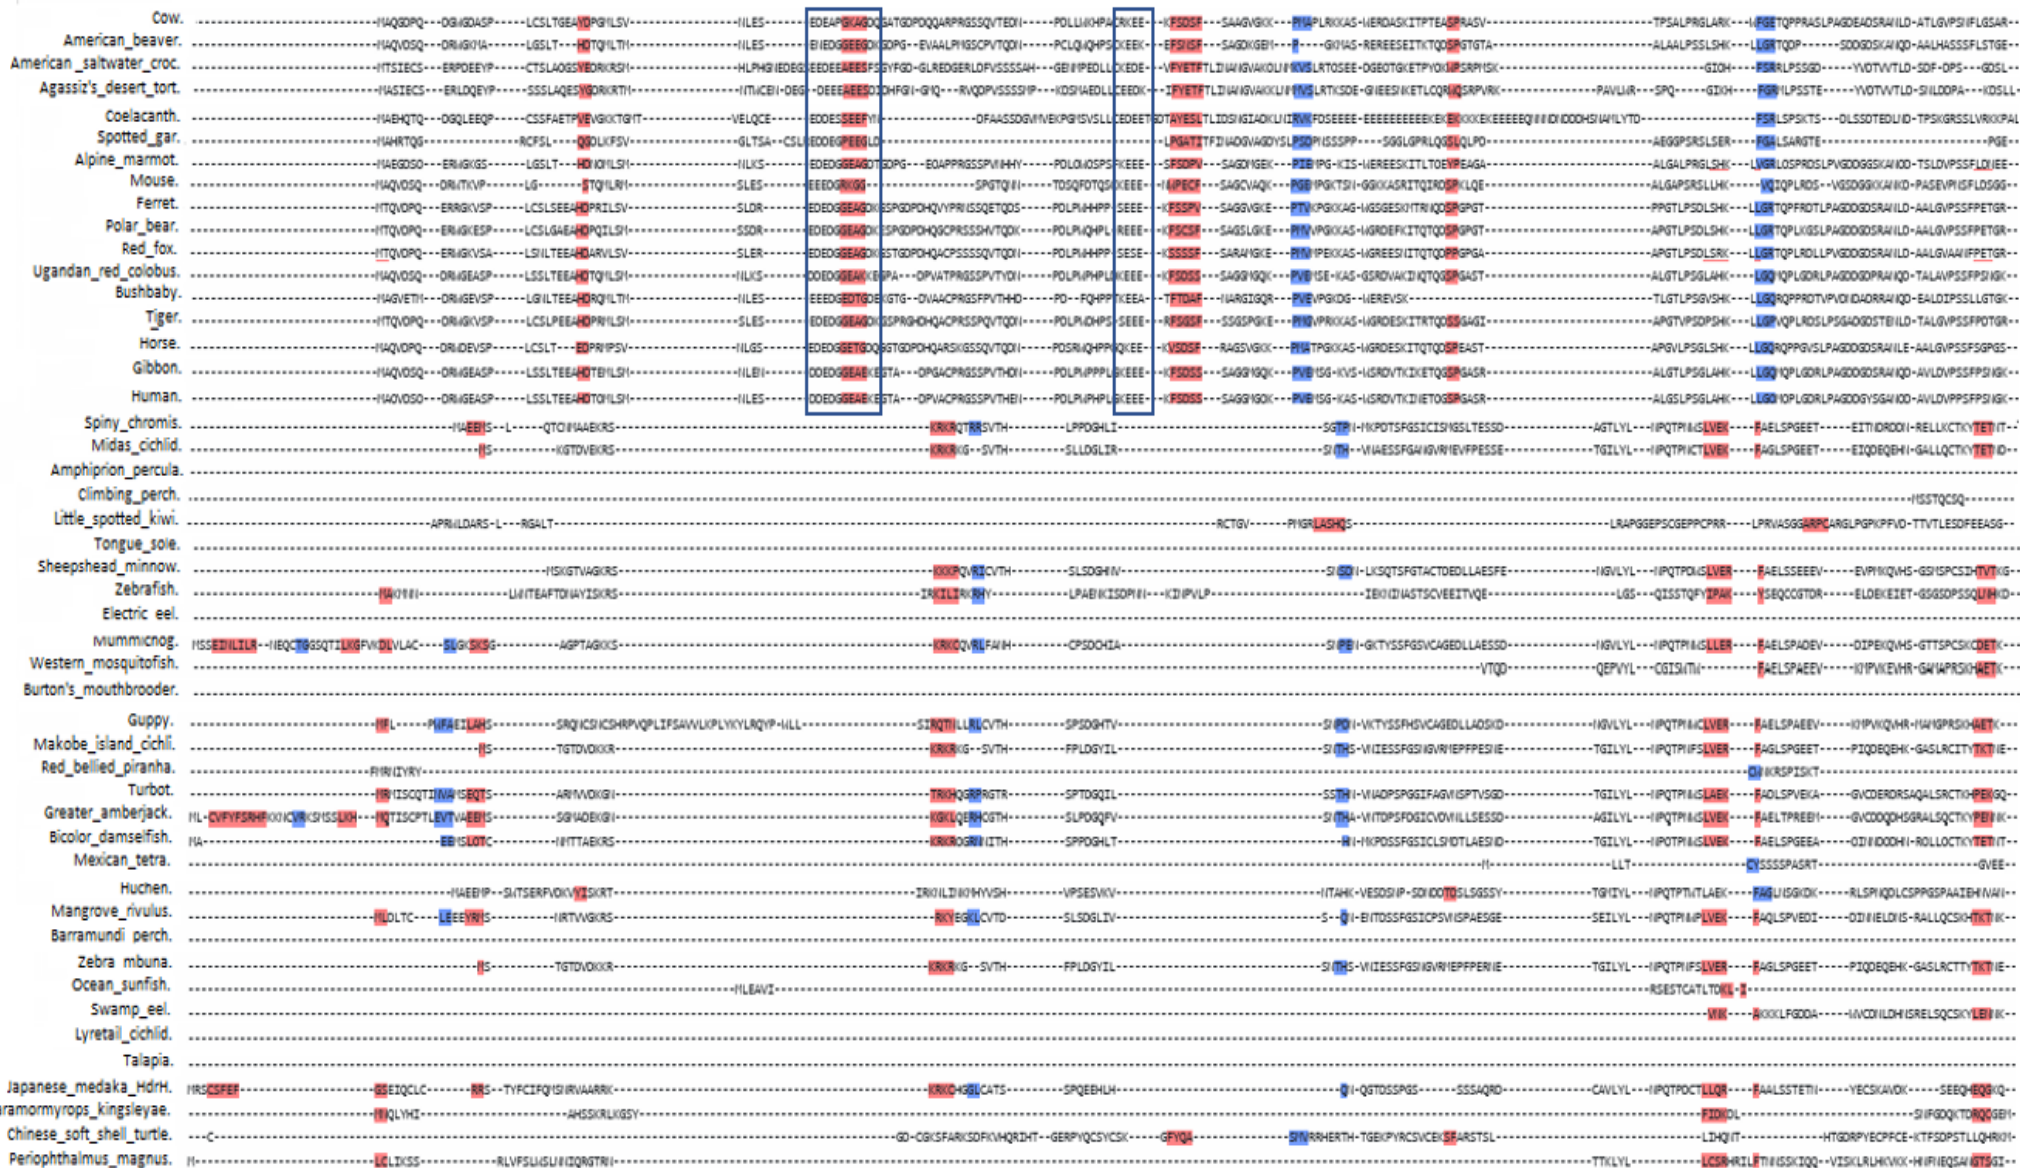

**Supplementary Figure 14. N-terminal regions of ZNF648 from range of species analysed by predicted secondary structure (PSIPRED) alignment.** Sequences shown aligned from residue 1 to 226 of human sequence. The cyan boxes surround putative patches of conserved charge residues. Secondary structure:  $\alpha$ -helix highlighted in red,  $\beta$ -sheet highlighted in blue

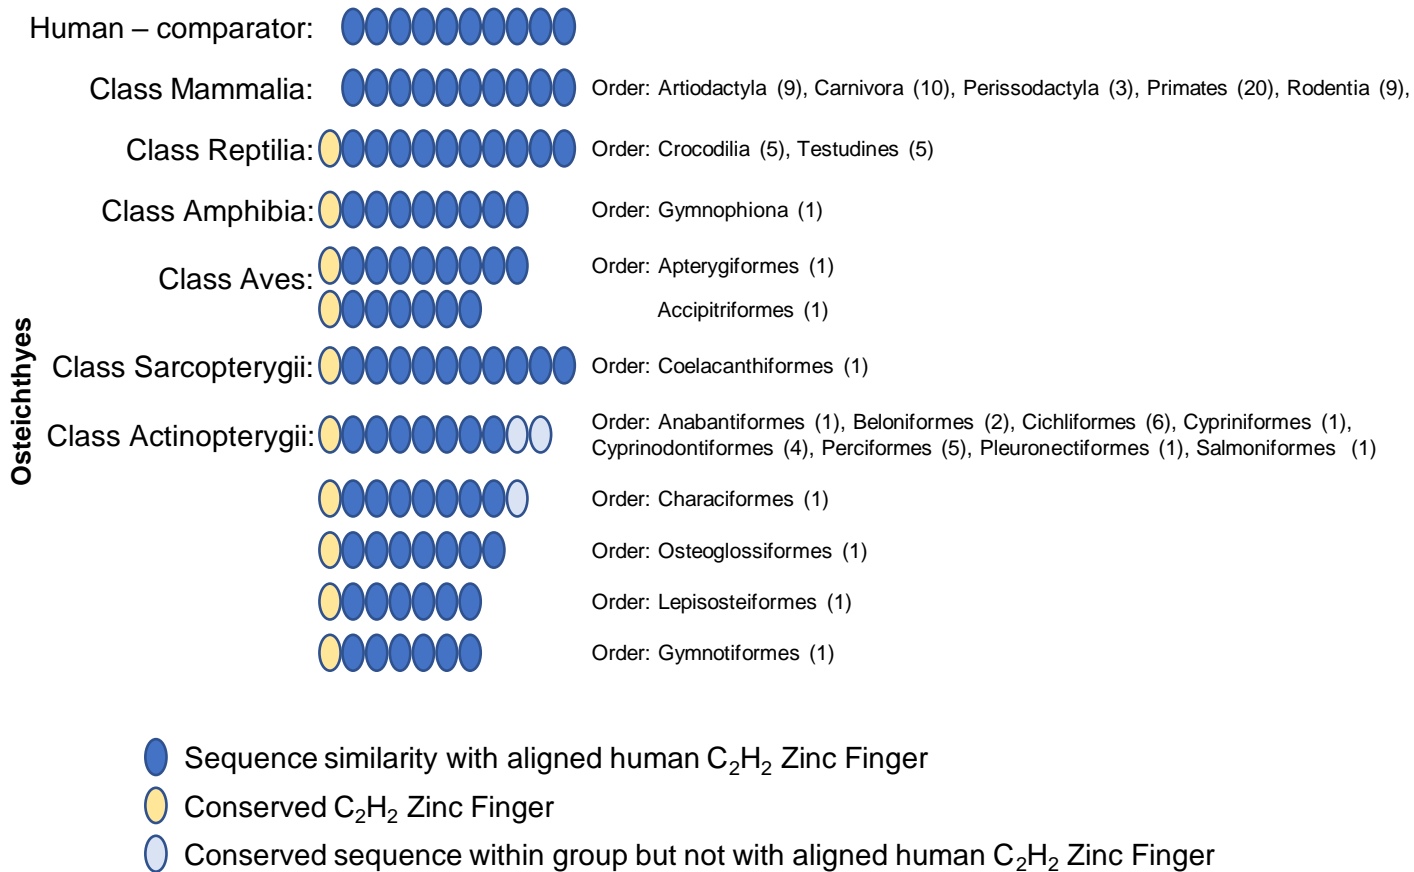

**Supplementary Figure 15. Schematic of ZNF648 Zinc Finger domain structure in range of animals.** Structure of human ZNF648 zinc finger domain is comparator. ZNF648 was identified in family members of all orders shown. Values in brackets are the number of members of each order for which sequences were compared.

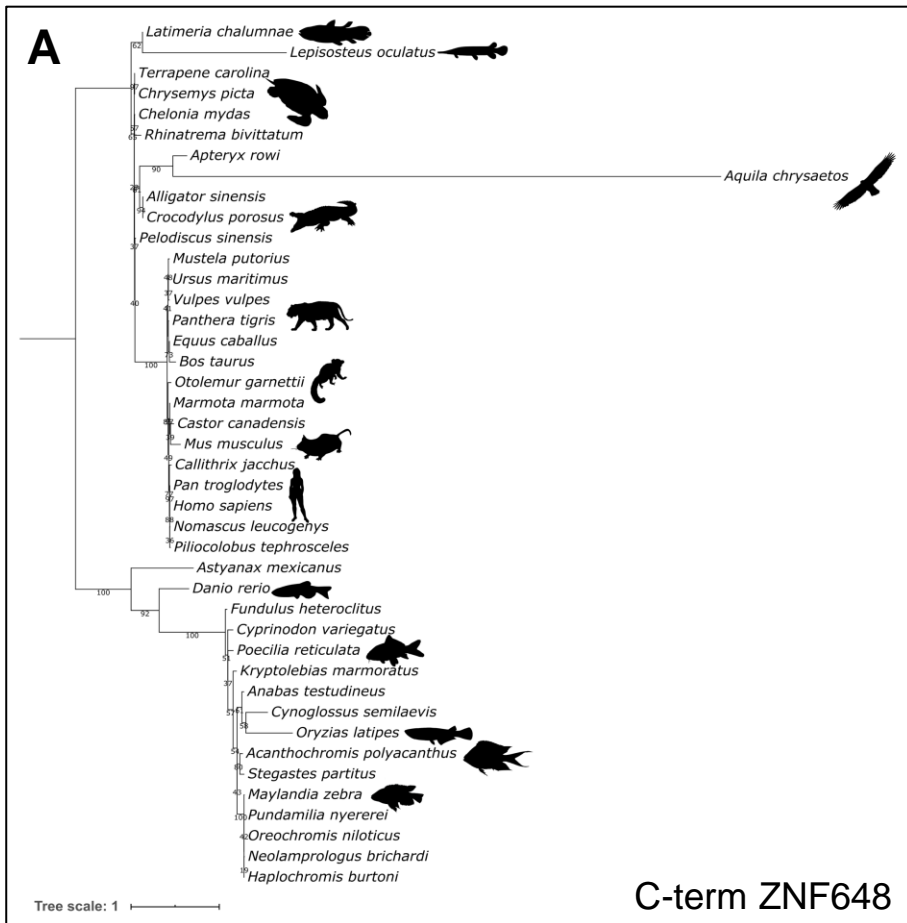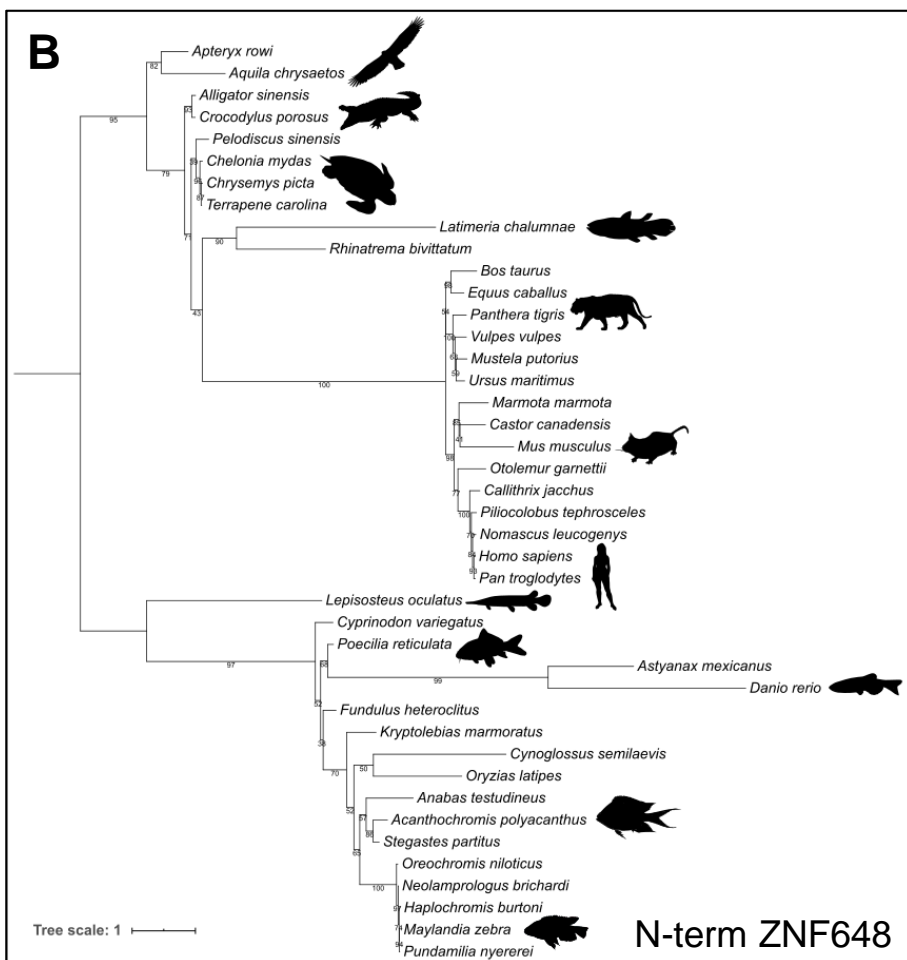

**Supplementary Figure 16. Phylogeny of ZNF648 orthologue**  
**A) ZNF648 C-terminal ZnF domain and B) ZNF648 N-terminal region in Osteichthyes.** See legend to Figure 8 for details.

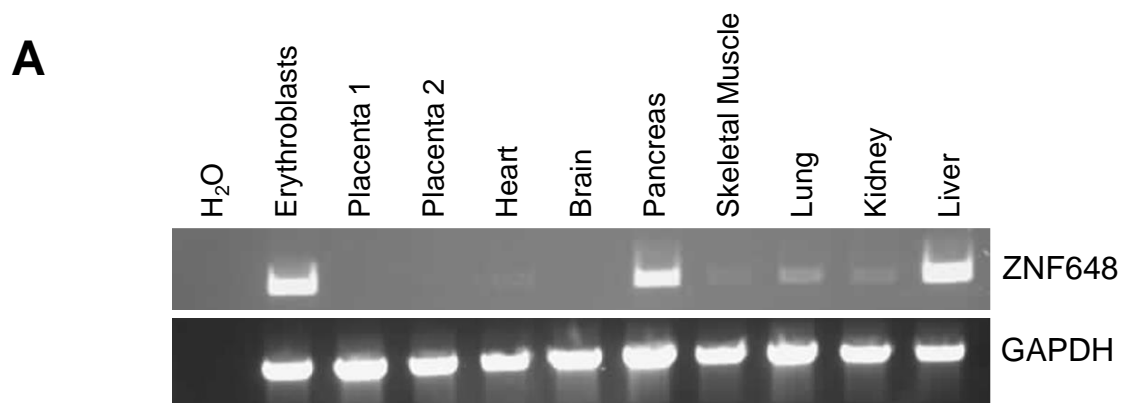

**B**

| GENE   | Forward primer             | Reverse primer             |
|--------|----------------------------|----------------------------|
| ZNF648 | 5'-GTATGGAAGCCTACGTGCTC-3' | 5'-AGAGGTCACACCCTAGTTCC-3' |
| GAPDH  | 5'-ACCACAGTCCATGCCATCAC-3' | 5'-TCCACCACCCTGTTGCTGTA-3' |

**Supplementary Figure 17. Expression of ZNF648 in range of human tissues.** A) ZNF648 transcript level analysed by PCR in range of tissues using Human MTC™ Panel I from Clontech along with day 8 adult erythroid cells. PCR of GAPDH was used as a loading control, along with a no cDNA control (H<sub>2</sub>O). B) Primer sequences for RT-PCR.

**Supplementary Table 1. Genes up and down regulated following ZNF648 knockdown.**

**Table 1A. genes down regulated**

|              |           |          |          |              |
|--------------|-----------|----------|----------|--------------|
| ABCC4        | ACER3     | AGPAT4   | AGPAT9   | AK7          |
| ALOX12       | ALOX5     | ANGPT1   | ANKRD27  | ANXA3        |
| APOBEC3A     | ARG1      | ARHGEF3  | ARPP-19  | ASAP2        |
| ATP6V1A      | AZIN1     | BANK1    | BCAN     | BDNF         |
| BMP2K        | BPGM      | BTK      | C12orf39 | C19orf33     |
| C19orf59     | C21orf45  | C2orf88  | C5orf4   | CA13         |
| CALD1        | CALM3     | CAPRIN1  | CCDC68   | CCND3        |
| CD226        | CD9       | CDC42EP3 | CDKN2D   | CEACAM1      |
| CLEC1B       | CLU       | CMTM5    | COL18A1  | COMMD6       |
| CRIPT        | CTSE      | CTTN     | CXCL5    | DAB2         |
| DAPP1        | DKK1      | DMC1     | DNM3     | EAF2         |
| EHD3         | ELK1      | ELOVL7   | ENDOD1   | F13A1        |
| F2R          | F2RL2     | FAM150B  | FAM40B   | FAM65A       |
| FCER1A       | FCER1G    | FCGR2A   | FERMT3   | FGFR1OP2     |
| FGFR3        | FHL1      | FLCN     | FLI1     | FRMD4B       |
| FYB          | FYN       | GAS2L1   | GFPT1    | GJA4         |
| GNAZ         | GNG11     | GOLSYN   | GP1BA    | GP5          |
| GP6          | GP9       | GPX7     | GSN      | GUCY1B3      |
| GYPA         | H1F0      | HBB      | HBE1     | HEMGN        |
| HGD          | HIPK2     | HMB5     | HPSE     | HSPC159      |
| HTR2A        | ICK       | IGF2BP3  | IGSF3    | ITGA2B       |
| ITGA6        | ITGB3     | JAZF1    | KALRN    | KCNE1        |
| KCNE3        | KIAA0776  | KIF26A   | KLHL5    | L2HGDH       |
| LAMP2        | LAT2      | LCN2     | LCP2     | LOC100127983 |
| LOC100130938 | LOC339803 | MAML3    | MAPK8    | MEF2C        |
| MEIS1        | MFAP3L    | MGLL     | MMRN1    | MOSPD1       |
| MPL          | MS4A2     | MS4A3    | MYCT1    | MYLK         |
| MYO9A        | NCF1C     | NFIB     | NRGN     | OGFRL1       |
| OSBP2        | PATL2     | PDE5A    | PDE7A    | PDLIM1       |
| PEAR1        | PECAM1    | PF4      | PF4V1    | PLEK         |
| PLS1         | PPBP      | PREP     | PRICKLE1 | PRTFDC1      |
| PTGS1        | QPCT      | RAB21    | RAB27B   | RAB6A        |
| RASGRP3      | RCN2      | RGS18    | RHD      | RTN1         |
| SCD5         | SDPR      | SELENBP1 | SELP     | SENP1        |
| SEPT5        | SERPINE2  | SF3B2    | SFRP1    | SH3BGRL3     |
| SH3BP5       | SH3TC2    | SHISA5   | SLC22A17 | SLC35D3      |
| SLC37A1      | SNCA      | SPARC    | ST3GAL6  | STARD8       |
| SUCNR1       | SYTL3     | TBXA2R   | TBXAS1   | TC2N         |
| TCF3         | TGFB1     | TMEM163  | TMEM40   | TMEM55A      |
| TMSB15A      | TUBO3     | TRPC6    | TUBA4A   | TUBB1        |
| UBASH3B      | VCL       | VDR      | VWF      | WFDC1        |
| ZNF185       | ZNF25     | ZNF479   |          |              |

**Table 1B. genes up regulated**

|           |           |          |          |          |
|-----------|-----------|----------|----------|----------|
| ABHD14A   | ACPL2     | ANKRD5   | ANKRD7   | AP1S3    |
| ARNTL2    | ASB9      | ATP8B1   | BLCAP    | C12orf5  |
| C1orf53   | C21orf2   | CALB1    | DACH1    | DDAH1    |
| DDX31     | DENND5B   | DOCK9    | DYX1C1   | EFCAB2   |
| EME2      | EPB41L5   | FAM135A  | FAM83H   | FMNL2    |
| FST       | HBS1L     | HFE      | HOMER1   | HOXA9    |
| HTR1F     | IKZF1     | KIAA1598 | LEPR     | LGALS3BP |
| LOC642852 | LOC729991 | LRRC7    | LTB      | MAGI3    |
| MARCKSL1  | MFSD3     | MIOS     | MIPOL1   | MOBKL2A  |
| MYO6      | NAT14     | NBPF1    | NMU      | NTS      |
| PANK1     | PDE3B     | PLEKHA1  | PNMAG6A  | PPAP2A   |
| PRTN3     | RABEP2    | RARS     | RDH10    | RUFY3    |
| SEPP1     | SGPL1     | SLC26A2  | SLC38A1  | SORBS1   |
| SPAG1     | STAMBPL1  | STX4     | STXBP6   | TANC1    |
| TJP1      | TMCO4     | TMEM117  | TMEM176B | TRIM26   |
| TSPAN6    | TULP4     | UBL3     | USP44    | WT1      |
| ZNF165    | ZNF521    | ZNF625   | ZSCAN16  |          |

**Supplementary Table 2. Gene names for proteins increased and decreased in level following ZNF648 knock down in adult erythroid cells.**

**Table 2A. Proteins decreased in level**

|          |           |               |          |          |
|----------|-----------|---------------|----------|----------|
| ALAS2    | ANKRD27   | ANXA2         | ANXA4    | AQP1     |
| AQP4     | ASXL2     | BCAM          | BPGM     | C15orf41 |
| C2orf88  | CA1       | CCND3         | CCPG1    | CD9      |
| CDRT4    | CENPV     | CKB           | CLASP2   | CMTM5    |
| DDRKG1   | DHX57     | DKFZp434P232  | DLG4     | DNAJB9   |
| DOK3     | EIF2AK1   | ENDOD1        | EPB42    | EPN2     |
| ERICH6B  | ESAM      | F13A1         | F2R      | FAM65A   |
| FBXO28   | FCER1G    | FCGR2A        | FLI1     | FYB      |
| GLYR1    | GP1BA     | GP1BB         | GP5      | GP9      |
| GUCY1B3  | GYP A     | HBA1          | HBA2     | HBB      |
| HBD      | HBG1      | HBMS          | HBZ      | HEMGN    |
| HMBS     | HPSE      | HVCN1         | IKBK G   | IMPA2    |
| ISG20    | ITGA2B    | ITGB3         | KALRN    | LGALS3   |
| LGALS L  | LINC00176 | LTBP1         | MARC     | MFF      |
| MGLL     | MTSS1L    | NCAPG         | NCF2     | NEK6     |
| NOGOC    | NRGN      | OSBP2         | PDE5A    | PDLIM1   |
| PF4      | PPBP      | PPP1R14A      | PRC1     | PREP     |
| QARS     | RAB27B    | RAB3IL1       | RAB5B    | RCN2     |
| RGCC     | RGS14     | RGS18         | RGS3     | RHCE     |
| RHOC     | RNF115    | RTN1          | RTN4     | S100A10  |
| SDPR     | SELENBP1  | SELP          | SERPINE1 | SERPINE2 |
| SH3BGRL3 | SLC2A1    | SLC4A1        | SOX6     | SPARC    |
| SQRDL    | SRPK2     | STON1-GTF2A1L | SULT1A1  | SULT1A3  |
| TBXAS1   | TCF3      | THBS1         | TUBB1    | UROS     |
| VWF      | ZNF14     | ZNF397        |          |          |

**Table 2B. Proteins increased in level**

|                |                |          |               |              |
|----------------|----------------|----------|---------------|--------------|
| A1BG           | ABCA12         | ABI2     | ACTR1A        | ADAR2d       |
| AFM            | AGKC           | AGT      | AHSG          | ALB          |
| AMBP           | AMBP           | ANKLE1   | APC2          | APOA1        |
| APOA2          | APOA4          | APOC2    | APOC3         | APOE         |
| APOH           | APOL1          | APOM     | ATP2B1        | ATRN         |
| ATXN2          | AZGP1          | BSDC1    | C19orf47      | C1QB         |
| C1S            | C3             | C4B      | C4orf29       | C5           |
| C6             | C7             | C9       | CALB1         | CBX3         |
| CCAR1          | CCNL1          | CD5L     | CD5L          | CDC42BPB     |
| CF1            | CFHR1          | CFI      | COL23A1       | CP           |
| CPEB3          | CSNK1D         | DACH1    | DKFZp434K0831 | DKFZp667N107 |
| DKFZp686K03196 | DKFZp686N02209 | DOCK9    | EIF2C3        | ENTHD2       |
| EPCAM          | EPS8L1         | F12      | F2            | F2           |
| FAM127A        | FBXW9          | FLJ37549 | FRMPD3        | GC           |
| GLUL           | GML            | GPT2     | GSKIP         | HAT1         |
| hCG            | hCG_40889      | HNRNPA3  | HNRNPC        | HNRNPL       |
| HP             | HPR            | HPX      | HPX           | HRG          |
| HSP90AB3P      | IDH3A          | IGHA1    | IGHG1         | IGHG1        |
| IGHG2          | IGHG3          | IGHM     | IGKC          | IGKV1-17     |
| IGKV3-20       | IGKV4-1        | IGLC1    | IGM           | ITIH1        |
| ITIH2          | ITIH2          | KANSL3   | KIAA1731      | KIT          |
| KNG1           | KRT6A          | LAMA2    | LRG1          | LRRD1        |
| LUM            | MFS D3         | MGAT5    | MTG1          | MYO5A        |
| NBL1           | NCOA5          | NONO     | NRXN3         | orm1         |
| ORM2           | PANK1          | PANK3    | PGLYRP2       | PKD1         |
| PLG            | PON1           | PPAP2A   | PPIG          | PRPF40A      |
| PTOV1          | PURG           | RAB6A    | RALY          | RAP2C        |
| RBBP6          | RBM1           | RBM12B   | RBM15         | RBM25        |
| RBMX           | RBP4           | RGPD4    | RNF135        | SAFB         |
| SAFB2          | SERPINA1       | SERPINA3 | SERPINA6      | SERPINA7     |
| SERPINC1       | SERPIND1       | SERPINF1 | SERPINF2      | SERPING1     |
| SFPQ           | SFRS10         | SLTM     | SON           | SPIN1        |
| SRSF10         | SRSF8          | SRSF9    | SUB1          | SYNCRIP      |
| TF             | TRA2A          | TSPAN6   | TTR           | VTN          |
| ZBED9          | ZNF106         | ZNF326   | ZNF638        | ZNF814       |

**Supplementary Table 3. Gene names for proteins increased in level following ZNF648 knock down in adult erythroid cells and in erythroid cells differentiated from iPSC lines.**

|       |       |         |          |
|-------|-------|---------|----------|
| A1BG  | C3    | IGHA1   | RF-IP9   |
| AFM   | C9    | IGHG1   | SERPINA1 |
| AGT   | CD5L  | IGHG3   | SERPINA3 |
| AHSG  | CF1   | IGL     | SERPINA7 |
| AMBP  | CP    | IGL@    | SERPINC1 |
| APOAI | F2    | KNG1    | SERPIND1 |
| APOA4 | F12   | LUM     | SERPINF1 |
| APOC2 | GC    | ORM1    | SERPING1 |
| APOC3 | HP    | ORM2    | VTN      |
| APOH  | HPX   | PGLYRP2 | ZBED9    |
| APOL1 | HRG   | PLG     |          |
| APOM  | IDH3A | RBP4    |          |

**Supplementary Table 4. Sequence similarity of ZNF648 across a range of mammals.**

| Organism<br>Subject Human                                                          | C-terminal zinc<br>finger domain<br>homology (%) | N-terminal region<br>homology (%) | Whole protein<br>homology (%) |
|------------------------------------------------------------------------------------|--------------------------------------------------|-----------------------------------|-------------------------------|
| <b>Great Ape:</b> Bonobo/Pygmy Chimpanzee ( <i>Pan paniscus</i> )                  | 100                                              | 98                                | 99                            |
| <b>Lesser Ape:</b> White-Cheeked Gibbon ( <i>Nomascus leucogenys</i> )             | 100                                              | 94                                | 97                            |
| <b>Old World Monkey:</b> Drill ( <i>Mandrillus leucophaeus</i> )                   | 99                                               | 89                                | 94                            |
| <b>New World Monkey:</b> White-headed capuchin ( <i>Cebus capucinus imitator</i> ) | 98                                               | 87                                | 92                            |
| <b>Cat</b> ( <i>Felis catus</i> )                                                  | 97                                               | 70                                | 83                            |
| <b>Dog</b> ( <i>Canis lupus familiaris</i> )                                       | 97                                               | 71                                | 84                            |
| <b>Horse</b> ( <i>Equus caballus</i> )                                             | 97                                               | 69                                | 83                            |
| <b>Polar Bear</b> ( <i>Ursus maritimus</i> )                                       | 97                                               | 72                                | 84                            |
| <b>Orca</b> ( <i>Orcinus orca</i> )                                                | 96                                               | 64                                | 79                            |
| <b>Mouse</b> ( <i>Mus musculus</i> )                                               | 94                                               | 50                                | 73                            |

**Supplementary Table 5. ZNF648 sequence conservation between closely related species.**

| <b>Great Ape</b><br>Subject: Human                                                                            | C-terminal zinc finger domain homology (%) | N-terminal region homology (%) | Whole protein homology (%) |
|---------------------------------------------------------------------------------------------------------------|--------------------------------------------|--------------------------------|----------------------------|
| Bonobo/pygmy chimp                                                                                            | 100                                        | 98                             | 99                         |
| Gorilla                                                                                                       | 100                                        | 98                             | 99                         |
| Common chimpanzee                                                                                             | 100                                        | 97                             | 98                         |
| Sumatran Orang-utan                                                                                           | 99                                         | 97                             | 98                         |
| <b>Old World Monkey</b><br>Subject: Drill ( <i>Mandrillus leucophaeus</i> ; family Cercopithecidae)           | C-terminal zinc finger domain homology (%) | N-terminal region homology (%) | Whole protein homology (%) |
| <b>Family CERCOPTHECINAE</b>                                                                                  |                                            |                                |                            |
| <i>Macaca nemestrina</i> (Southern pig-tailed macaque)                                                        | 99                                         | 97                             | 98                         |
| <i>Theropithecus gelada</i> (Gelada baboon)                                                                   | 100                                        | 97                             | 98                         |
| <i>Macaca fascicularis</i> (Crab-eating macaque)                                                              | 99                                         | 97                             | 98                         |
| <i>Papio anubis</i> (Olive baboon)                                                                            | 100                                        | 97                             | 98                         |
| <i>Macaca mulatta</i> (Rhesus macaque)                                                                        | 99                                         | 97                             | 98                         |
| <i>Cercocebus atys</i> (Sooty mangabey)                                                                       | 100                                        | 96                             | 98                         |
| <i>Chlorocebus sabaeus</i> (Green monkey)                                                                     | 99                                         | 94                             | 96                         |
| <b>Family COLOBINAE</b>                                                                                       |                                            |                                |                            |
| <i>Rhinopithecus bieti</i> (Black snub-nosed monkey)                                                          | 100                                        | 93                             | 96                         |
| <i>Rhinopithecus roxellana</i> (Golden snub-nosed monkey)                                                     | 100                                        | 93                             | 96                         |
| <i>Colobus angolensis</i> (Angolan colobus)                                                                   | 100                                        | 92                             | 96                         |
| <b>Old World Monkey</b><br>Subject: Angolan colobus ( <i>Colobus angolensis</i> ; family Colobus)             | C-terminal zinc finger domain homology (%) | N-terminal region homology (%) | Whole protein homology (%) |
| <b>Family COLOBINAE</b>                                                                                       |                                            |                                |                            |
| <i>Piliocolobus tephrosceles</i> (Ugandan red colobus)                                                        | 100                                        | 97                             | 98                         |
| <i>Rhinopithecus bieti</i> (Black snub-nosed monkey)                                                          | 100                                        | 96                             | 98                         |
| <i>Rhinopithecus roxellana</i> (Golden snub-nosed monkey)                                                     | 100                                        | 96                             | 98                         |
| <b>Family CERCOPTHECINAE</b>                                                                                  |                                            |                                |                            |
| <i>Chlorocebus sabaeus</i> (Green monkey)                                                                     | 99                                         | 95                             | 97                         |
| <i>Macaca nemestrina</i> (Southern pig-tailed macaque)                                                        | 99                                         | 94                             | 96                         |
| <i>Macaca fascicularis</i> (Crab-eating macaque)                                                              | 99                                         | 94                             | 96                         |
| <i>Papio anubis</i> (Olive baboon)                                                                            | 100                                        | 93                             | 96                         |
| <i>Theropithecus gelada</i> (Gelada baboon)                                                                   | 100                                        | 93                             | 96                         |
| <i>Macaca mulatta</i> (Rhesus macaque)                                                                        | 99                                         | 93                             | 96                         |
| <i>Cercocebus atys</i> (Sooty mangabey)                                                                       | 100                                        | 92                             | 96                         |
| <b>New World Monkey</b><br>Subject: White-headed capuchin ( <i>Cebus capucinus imitator</i> ; family Cebidae) | C-terminal zinc finger domain homology (%) | N-terminal region homology (%) | Whole protein homology (%) |
| <b>Cebidae</b>                                                                                                |                                            |                                |                            |
| <i>Saimiri boliviensis</i>                                                                                    | 98                                         | 92                             | 96                         |
| <b>Aotidae</b>                                                                                                |                                            |                                |                            |
| <i>Aotus nancymae</i>                                                                                         | 98                                         | 92                             | 95                         |
| <b>Callitrichidae</b>                                                                                         |                                            |                                |                            |
| <i>Callithrix jacchus</i>                                                                                     | 98                                         | 90                             | 94                         |



|                                                                          |                                                   |                                       |                                   |
|--------------------------------------------------------------------------|---------------------------------------------------|---------------------------------------|-----------------------------------|
| <b>Felidae</b><br><b>Subject: Cat</b> ( <i>Felis catus</i> )             | <b>C-terminal zinc finger domain homology (%)</b> | <b>N-terminal region homology (%)</b> | <b>Whole protein homology (%)</b> |
| <i>Acinonyx jubatus</i> (Cheetah)                                        | 100                                               | 98                                    | 99                                |
| <i>Puma concolor</i> (Cougar)                                            | 100                                               | 98                                    | 99                                |
| <i>Panthera tigris altaica</i> (Siberian Tiger)                          | 100                                               | 97                                    | 98                                |
| <i>Panthera pardus</i> (Leopard)                                         | 100                                               | 97                                    | 98                                |
| <b>Carnidae</b><br><b>Subject: Dog</b> ( <i>Canis lupus familiaris</i> ) | <b>C-terminal zinc finger domain homology (%)</b> | <b>N-terminal region homology (%)</b> | <b>Whole protein homology (%)</b> |
| <i>Canis lupus dingo</i> (Dingo)                                         | 100                                               | 100                                   | 100                               |
| <i>Vulpes vulpes</i> (red fox)                                           | 100                                               | 96                                    | 98                                |
| <b>Equine</b><br><b>Subject: Horse</b> ( <i>Equus caballus</i> )         | <b>C-terminal zinc finger domain homology (%)</b> | <b>N-terminal region homology (%)</b> | <b>Whole protein homology (%)</b> |
| <i>Equus przewalskii</i> (Przewalski's horse)                            | 100                                               | 99                                    | 99                                |
| <i>Equus asinus</i> (Donkey)                                             | 100                                               | 99                                    | 99                                |
| <b>Ursidae</b><br><b>Subject: Polar bear</b> ( <i>Ursus maritimus</i> )  | <b>C-terminal zinc finger domain homology (%)</b> | <b>N-terminal region homology (%)</b> | <b>Whole protein homology (%)</b> |
| <i>Ursus arctos horribilis</i> (grizzly bear)                            | 100                                               | 100                                   | 100                               |
| <i>Ailuropoda melanoleuca</i> (giant panda)                              | 100                                               | 93                                    | 96                                |
| <b>Muroidea</b><br><b>Subject: House Mouse</b> ( <i>Mus musculus</i> )   | <b>C-terminal zinc finger domain homology (%)</b> | <b>N-terminal region homology (%)</b> | <b>Whole protein homology (%)</b> |
| Ryukyu Mouse ( <i>Mus caroli</i> )                                       | 99                                                | 95                                    | 97                                |
| Gairdner's Shrewmouse ( <i>Mus pahari</i> )                              | 98                                                | 86                                    | 93                                |
| Brown Rat ( <i>Rattus norvegicus</i> )                                   | 98                                                | 79                                    | 89                                |
| Desert Woodrat ( <i>Neotoma lepida</i> )                                 | 97                                                | 71                                    | 85                                |
| Deer Mouse ( <i>Peromyscus maniculatus bairdii</i> )                     | 97                                                | 72                                    | 85                                |
| Thicket rat ( <i>Grammomys surdaster</i> )                               | 98                                                | 80                                    | 90                                |
| Chinese Hamster ( <i>Cricetulus griseus</i> )                            | 98                                                | 70                                    | 85                                |
| Mongolian gerbil ( <i>Meriones unguiculatus</i> )                        | 96                                                | 71                                    | 84                                |
| <b>Cetaceans</b><br><b>Subject: Orca</b> ( <i>Orcinus orca</i> )         | <b>C-terminal zinc finger domain homology (%)</b> | <b>N-terminal region homology (%)</b> | <b>Whole protein homology (%)</b> |
| <i>Delphinapterus leucas</i> (Beluga whale)                              | 98                                                | 97                                    | 98                                |
| <i>Eschrichtius robustus</i> (Grey Whale)                                | 99                                                | 95                                    | 97                                |
| <i>Balaenoptera acutorostrata scammoni</i> (Minke Whale)                 | 99                                                | 93                                    | 96                                |
| <i>Monodon Monoceros</i> (Narwhal)                                       | 98                                                | 98                                    | 98                                |
| <i>Lagenorhynchus obliquidens</i> (Pacific white-sided dolphin)          | 98                                                | 99                                    | 98                                |
| <i>Tursiops truncatus</i> (Common bottlenose dolphin)                    | 98                                                | 96                                    | 98                                |
| <i>lipotes vexillifer</i> (Baiji)                                        | 98                                                | 96                                    | 97                                |
| <i>Neophocaena asiaeorientalis asiaeorientalis</i> (Finless porpoise)    | 98                                                | 96                                    | 97                                |

'Subject' is the ZNF648 sequence used to compare with that of the organisms in respective table. There was a very limited number of ZNF648 sequences available for many family and sub family members.
